# Supplementary material for: Azithromycin and Ceftriaxone Differentially Activate NLRP3 in LPS Primed Cancer Cells
Source: MDPI journal article supplement (doi:10.3390/ijms23169484), 2022-08-22
Supplement: s1 [file s1]

# Azithromycin and Ceftriaxone differentially activate NLRP3 in LPS Primed Cancer Cells

## Supplementary Tables:

**Table S1.** The effect of azithromycin and ceftriaxone on mRNA expression of *NLRP3* and downstream genes.

| Cell type | Gene             | Comparison between | Mean Difference | Std. Err. | p      | 95% Confidence Interval |             |
|-----------|------------------|--------------------|-----------------|-----------|--------|-------------------------|-------------|
|           |                  |                    |                 |           |        | Lower Bound             | Upper Bound |
| A549      | NLRP3            | U-L                | -54.94          | 0.01      | <0.001 | -54.98                  | -54.90      |
|           |                  | U-LN               | -97.45          | 0.01      | <0.001 | -97.49                  | -97.41      |
|           |                  | U-LA               | -71.66          | 0.01      | <0.001 | -71.70                  | -71.62      |
|           |                  | U-LC               | -38.44          | 0.01      | <0.001 | -38.48                  | -38.40      |
|           |                  | L-LN               | -42.50          | 0.01      | <0.001 | -42.54                  | -42.46      |
|           |                  | L-LA               | -16.71          | 0.01      | <0.001 | -16.75                  | -16.67      |
|           |                  | L-LC               | 16.51           | 0.01      | <0.001 | 16.47                   | 16.55       |
|           |                  | LN-LA              | 25.79           | 0.01      | <0.001 | 25.75                   | 25.83       |
|           |                  | LN-LC              | 59.01           | 0.01      | <0.001 | 58.97                   | 59.05       |
| A549      | pro-IL-1 $\beta$ | LA-LC              | 33.22           | 0.01      | <0.001 | 33.18                   | 33.26       |
|           |                  | U-L                | -4.80           | 0.01      | <0.001 | -4.84                   | -4.76       |
|           |                  | U-LN               | -10.07          | 0.01      | <0.001 | -10.11                  | -10.04      |
|           |                  | U-LA               | -6.80           | 0.01      | <0.001 | -6.83                   | -6.76       |
|           |                  | U-LC               | 0.43            | 0.01      | 0.001  | 0.39                    | 0.46        |
|           |                  | L-LN               | -5.27           | 0.01      | <0.001 | -5.31                   | -5.24       |
|           |                  | L-LA               | -1.99           | 0.01      | <0.001 | -2.03                   | -1.96       |
|           |                  | L-LC               | 5.23            | 0.01      | <0.001 | 5.19                    | 5.27        |
|           |                  | LN-LA              | 3.28            | 0.01      | <0.001 | 3.24                    | 3.32        |
| A549      | Pro-CASP1        | LN-LC              | 10.50           | 0.01      | <0.001 | 10.46                   | 10.54       |
|           |                  | LA-LC              | 7.22            | 0.01      | <0.001 | 7.19                    | 7.26        |
|           |                  | U-L                | -18.31          | 0.01      | <0.001 | -18.33                  | -18.28      |
|           |                  | U-LN               | -95.23          | 0.01      | <0.001 | -95.25                  | -95.20      |
|           |                  | U-LA               | -32.38          | 0.01      | <0.001 | -32.41                  | -32.35      |
|           |                  | U-LC               | -14.95          | 0.01      | <0.001 | -14.97                  | -14.92      |
|           |                  | L-LN               | -76.92          | 0.01      | <0.001 | -76.95                  | -76.89      |
|           |                  | L-LA               | -14.07          | 0.01      | <0.001 | -14.10                  | -14.05      |
|           |                  | L-LC               | 3.36            | 0.01      | <0.001 | 3.33                    | 3.39        |
| PC3       | NLRP3            | LN-LA              | 62.85           | 0.01      | <0.001 | 62.82                   | 62.87       |
|           |                  | LN-LC              | 80.28           | 0.01      | <0.001 | 80.25                   | 80.31       |
|           |                  | LA-LC              | 17.43           | 0.01      | <0.001 | 17.40                   | 17.46       |
|           |                  | U-L                | -7.66           | 0.06      | <0.001 | -7.86                   | -7.46       |
|           |                  | U-LN               | -40.14          | 0.06      | <0.001 | -40.34                  | -39.94      |
|           |                  | U-LA               | -1.98           | 0.06      | <0.001 | -2.18                   | -1.78       |
|           |                  | U-LC               | -1.14           | 0.06      | <0.001 | -1.34                   | -0.94       |
|           |                  | L-LN               | -32.48          | 0.06      | <0.001 | -32.68                  | -32.28      |
|           |                  | L-LA               | 5.68            | 0.06      | <0.001 | 5.48                    | 5.88        |
| PC3       | pro-IL-1 $\beta$ | L-LC               | 6.52            | 0.06      | <0.001 | 6.32                    | 6.72        |
|           |                  | LN-LA              | 38.16           | 0.06      | <0.001 | 37.96                   | 38.36       |
|           |                  | LN-LC              | 39.00           | 0.06      | <0.001 | 38.80                   | 39.20       |
|           |                  | LA-LC              | 0.84            | 0.06      | <0.001 | 0.64                    | 1.04        |
|           |                  | U-L                | -1.57           | 0.02      | <0.001 | -1.64                   | -1.51       |
|           |                  | U-LN               | -32.55          | 0.02      | <0.001 | -32.61                  | -32.49      |
|           |                  | U-LA               | -1.92           | 0.02      | <0.001 | -1.98                   | -1.86       |
|           |                  | U-LC               | -0.41           | 0.02      | <0.001 | -0.47                   | -0.35       |
|           |                  | L-LN               | -30.98          | 0.02      | <0.001 | -31.04                  | -30.92      |
| PC3       | Pro-CASP1        | L-LA               | -0.35           | 0.02      | <0.001 | -0.41                   | -0.29       |
|           |                  | L-LC               | 1.16            | 0.02      | <0.001 | 1.10                    | 1.22        |
|           |                  | LN-LA              | 30.63           | 0.02      | <0.001 | 30.57                   | 30.69       |
|           |                  | LN-LC              | 32.14           | 0.02      | <0.001 | 32.08                   | 32.20       |
|           |                  | LA-LC              | 1.51            | 0.02      | <0.001 | 1.45                    | 1.57        |
|           |                  | U-L                | 0.50            | 0.02      | <0.001 | 0.43                    | 0.58        |
|           |                  | U-LN               | -2.30           | 0.02      | <0.001 | -2.37                   | -2.22       |
|           |                  | U-LA               | -0.68           | 0.02      | <0.001 | -0.75                   | -0.60       |
|           |                  | U-LC               | 0.11            | 0.02      | 0.006  | 0.03                    | 0.18        |
| PC3       | Pro-CASP1        | L-LN               | -2.80           | 0.02      | <0.001 | -2.87                   | -2.72       |
|           |                  | L-LA               | -1.18           | 0.02      | <0.001 | -1.25                   | -1.10       |
|           |                  | L-LC               | -0.40           | 0.02      | <0.001 | -0.47                   | -0.32       |
|           |                  | LN-LA              | 1.62            | 0.02      | <0.001 | 1.55                    | 1.70        |
|           |                  | LN-LC              | 2.40            | 0.02      | <0.001 | 2.33                    | 2.48        |
|           |                  | LA-LC              | 0.78            | 0.02      | <0.001 | 0.71                    | 0.86        |

\*P-value calculated using One Way Anova and Tukey Test. P values less than 0.05 were considered significant. U: Untreated, , L: LPS, LN: LPS-Ng, LA: LPS-Az, LC: LPS-Cf, n=3.

**Table S2.** The effect of azithromycin and ceftriaxone on IL-1 $\beta$  secretion

| Cell line | Comparison between | Mean Difference | Std. Err. | p      | 95% CI      |             |
|-----------|--------------------|-----------------|-----------|--------|-------------|-------------|
|           |                    |                 |           |        | Lower Bound | Upper Bound |
| A549      | U-L                | -0.06           | 0.09      | 0.961  | -0.36       | 0.24        |
|           | U-LN               | -0.41           | 0.09      | 0.008  | -0.70       | -0.11       |
|           | U-LA               | 0.01            | 0.09      | 1.000  | -0.29       | 0.31        |
|           | U-LC               | 0.05            | 0.09      | 0.984  | -0.25       | 0.34        |
|           | L-LN               | -0.35           | 0.09      | 0.022  | -0.64       | -0.05       |
|           | L-LA               | 0.07            | 0.09      | 0.926  | -0.23       | 0.37        |
|           | L-LC               | 0.11            | 0.09      | 0.766  | -0.19       | 0.40        |
|           | LN-LA              | 0.42            | 0.09      | 0.007  | 0.12        | 0.72        |
|           | LN-LC              | 0.45            | 0.09      | 0.004  | 0.15        | 0.75        |
|           | LA-LC              | 0.03            | 0.09      | 0.995  | -0.26       | 0.33        |
| PC3       | U-L                | -0.33           | 0.07      | 0.007  | -0.58       | -0.09       |
|           | U-LN               | -1.89           | 0.07      | <0.001 | -2.13       | -1.64       |
|           | U-LA               | -0.26           | 0.07      | 0.032  | -0.50       | -0.02       |
|           | U-LC               | -0.05           | 0.07      | 0.954  | -0.29       | 0.19        |
|           | L-LN               | -1.55           | 0.07      | <0.001 | -1.79       | -1.31       |
|           | L-LA               | 0.19            | 0.05      | 0.034  | 0.01        | 0.36        |
|           | L-LC               | 0.28            | 0.07      | 0.021  | 0.04        | 0.52        |
|           | LN-LA              | 1.62            | 0.07      | <0.001 | 1.38        | 1.86        |
|           | LN-LC              | 1.84            | 0.07      | <0.001 | 1.59        | 2.08        |
|           | LA-LC              | 0.21            | 0.07      | 0.093  | -0.03       | 0.45        |

\*P-value calculated using One Way Anova and Tukey Test. P values less than 0.05 were considered significant and showed in bold. U: Untreated, L: LPS, LN: LPS-Ng, LA: LPS-Az, LC: LPS-Cf, n=2.

**Table S3.** The effect of azithromycin and ceftriaxone on cell death.

| Cell | Cell death                 | df   | Test statistics | p (within group) | Comparison between | p (pair-wise) |
|------|----------------------------|------|-----------------|------------------|--------------------|---------------|
| A549 | Early apoptosis (Q1)       | 3.00 | 9.46            | 0.024            | U-L                | 0.537         |
|      |                            |      |                 |                  | U-LA               | 1.000         |
|      |                            |      |                 |                  | U-LC               | 0.130         |
|      |                            |      |                 |                  | L-LA               | 1.000         |
|      |                            |      |                 |                  | L-LC               | 1.000         |
|      |                            |      |                 |                  | LA-LC              | 0.537         |
| A549 | Other cell death (Q2 + Q4) | 3    | 6.92            | 0.074            |                    |               |
| PC3  | Early apoptosis (Q1)       | 3    | 9.16            | 0.027            | U-L                | 1.000         |
|      |                            |      |                 |                  | U-LA               | 0.085         |
|      |                            |      |                 |                  | U-LC               | 0.905         |
|      |                            |      |                 |                  | L-LA               | 0.059         |
|      |                            |      |                 |                  | L-LC               | 0.884         |
|      |                            |      |                 |                  | LA-LC              | 1.000         |
| PC3  | Other cell death (Q2 + Q4) | 3    | 6.73            | 0.081            |                    |               |

\*P-value calculated using Independent Samples Kruskal Wallis Test. P values less than 0.05 were considered significant. U:

Untreated, L: LPS, LN: LPS-Ng, LA: LPS-Az, LC: LPS-Cf

**Table S4:** The effect of azithromycin and ceftriaxone on cytokine releasing pattern of A549 and PC3 cells.

|             | A549    |         |         |         |         | PC3     |         |         |         |         |
|-------------|---------|---------|---------|---------|---------|---------|---------|---------|---------|---------|
|             | U       | L       | LN      | LA      | LC      | U       | L       | LN      | LA      | LC      |
| EGF         | 4.78    | 3.6     | <2.22↓  | 2.95    | <2.22↓  | 8.92    | 6.82    | 16.11   | 6.34    | 7.06    |
| FGF-2       | 144.76  | 221.28  | 3527    | 348.03  | 76.29   | 68.97   | 49.43   | 788.49  | 131.89  | 31.82   |
| Eotaxin     | <2.27↓  | <2.27↓  | <2.27↓  | <2.27↓  | <2.27↓  | <2.27↓  | <2.27↓  | <2.27↓  | <2.27↓  | <2.27↓  |
| TGF-α       | <1.63↓  | <1.63↓  | 3.49    | <1.63↓  | <1.63↓  | 6.72    | 6.33    | 11.6    | 4.9     | 7.91    |
| G-CSF       | 143.8   | 173.47  | 49.3    | 131.6   | 135.69  | 16534   | 15394   | 3220    | 15207   | >18601↑ |
| Flt-3L      | <2.49↓  | <2.49↓  | <2.49↓  | <2.49↓  | <2.49↓  | <2.49↓  | <2.49↓  | <2.49↓  | <2.49↓  | <2.49↓  |
| GM-CSF      | 42.82   | 41.5    | 15.49   | 39.75   | 41.72   | 3370    | 3597    | 880.79  | 3621    | 3801    |
| Fractalkine | 97.37   | 50.83   | 36.41   | 43.85   | 45.63   | 75.66   | 75.66   | 3.09    | 50.83   | 72.77   |
| IFNα2       | 14.6    | 18.71   | 18.71   | 26.1    | 23.64   | 15.42   | 20.36   | 2.58    | 22      | 22      |
| IFN-γ       | <1.51↓  | <1.51↓  | <1.51↓  | <1.51↓  | <1.51↓  | <1.51↓  | <1.51↓  | <1.51↓  | <1.51↓  | <1.51↓  |
| GRO         | >11613↑ | >11613↑ | 1161    | >11613↑ | >11613↑ | >11613↑ | >11613↑ | >11613↑ | >11613↑ | >11613↑ |
| IL-10       | NAN     |
| MCP-3       | <1.82↓  | <1.82↓  | <1.82↓  | <1.82↓  | <1.82↓  | <1.82↓  | <1.82↓  | <1.82↓  | <1.82↓  | <1.82↓  |
| IL12p40     | <1.77↓  | <1.77↓  | <1.77↓  | <1.77↓  | <1.77↓  | <1.77↓  | <1.77↓  | <1.77↓  | <1.77↓  | <1.77↓  |
| MDC         | <0.82↓  | 3.87    | <0.82↓  | 1.08    | <0.82↓  | <0.82↓  | 1.08    | <0.82↓  | <0.82↓  | 2.53    |
| IL12p70     | NAN     |
| PDGF-AA     | 591.57  | 684.61  | 115.97  | 425.81  | 509.15  | 16.57   | 16.09   | <1.71↓  | 28.24   | 21.84   |
| IL-13       | <1.56↓  | <1.56↓  | <1.56↓  | <1.56↓  | <1.56↓  | <1.56↓  | <1.56↓  | <1.56↓  | <1.56↓  | <1.56↓  |
| PDGF-AB/BB  | <16.00↓ | <16.00↓ | <16.00↓ | <16.00↓ | <16.00↓ | <16.00↓ | <16.00↓ | <16.00↓ | <16.00↓ | <16.00↓ |
| IL-15       | 2.06    | 2.73    | <1.30↓  | 3.06    | 1.42    | 2.84    | 2.73    | <1.30↓  | 3.4     | 3.4     |
| sCD40L      | <1.92↓  | <1.92↓  | <1.92↓  | <1.92↓  | <1.92↓  | <1.92↓  | <1.92↓  | <1.92↓  | <1.92↓  | <1.92↓  |
| IL-17A      | <1.70↓  | <1.70↓  | <1.70↓  | <1.70↓  | <1.70↓  | <1.70↓  | <1.70↓  | <1.70↓  | <1.70↓  | <1.70↓  |
| IL1Ra       | <3.98↓  | <3.98↓  | <3.98↓  | <3.98↓  | <3.98↓  | <3.98↓  | <3.98↓  | <3.98↓  | <3.98↓  | <3.98↓  |
| IL1α        | <1.55↓  | <1.55↓  | 8.59    | <1.55↓  | <1.55↓  | 14.25   | 23.05   | 372.39  | 12.8    | 1.93    |
| IL-9        | 7.17    | 5.84    | <1.67↓  | <1.67↓  | 2.12    | 15.34   | 9.8     | 42.33   | 11.3    | 8.74    |
| IL-1b       | <1.40↓  | <1.40↓  | 1.8     | <1.40↓  | <1.40↓  | <1.40↓  | <1.40↓  | 9.28    | <1.40↓  | <1.40↓  |
| IL-2        | <1.57↓  | <1.57↓  | <1.57↓  | <1.57↓  | <1.57↓  | <1.57↓  | <1.57↓  | <1.57↓  | <1.57↓  | <1.57↓  |
| IL-3        | <1.53↓  | <1.53↓  | <1.53↓  | <1.53↓  | <1.53↓  | <1.53↓  | <1.53↓  | <1.53↓  | <1.53↓  | <1.53↓  |
| IL-4        | 10.71   | 15.05   | <2.03↓  | 13.36   | 8.75    | 20.21   | 17.1    | 12.69   | 12.69   | 18.13   |
| IL-5        | <2.00↓  | <2.00↓  | <2.00↓  | <2.00↓  | <2.00↓  | <2.00↓  | <2.00↓  | <2.00↓  | <2.00↓  | <2.00↓  |
| IL-6        | 27.41   | 32.09   | <1.82↓  | 46.73   | 21.3    | 10.07   | 8.72    | 6.01    | 8.23    | 10.52   |
| IL-7        | <1.84↓  | <1.84↓  | <1.84↓  | <1.84↓  | <1.84↓  | <1.84↓  | <1.84↓  | <1.84↓  | <1.84↓  | <1.84↓  |
| IL-8        | 2437    | 3135    | 261.27  | 3374    | 2615    | >7775↑  | >7775↑  | 6395    | >7775↑  | >7775↑  |
| IP10        | 21.41   | 26.46   | 4.43    | 20.88   | 17.91   | 49.87   | 22.19   | 20.88   | 25.97   | 36.16   |
| MCP-1       | 5687    | 5682    | 1629    | 6142    | 6219    | 801.21  | 736.66  | 120.1   | 617.88  | 769.41  |
| MIP-1a      | <2.12↓  | <2.12↓  | <2.12↓  | <2.12↓  | <2.12↓  | <2.12↓  | <2.12↓  | <2.12↓  | <2.12↓  | <2.12↓  |
| MIP-1b      | <1.79↓  | <1.79↓  | <1.79↓  | <1.79↓  | <1.79↓  | <1.79↓  | <1.79↓  | 4.17    | <1.79↓  | <1.79↓  |
| Rantes      | <6.13↓  | <6.13↓  | <6.13↓  | <6.13↓  | <6.13↓  | <6.13↓  | <6.13↓  | <6.13↓  | <6.13↓  | <6.13↓  |
| TNFα        | <1.65↓  | 1.78    | <1.65↓  | <1.65↓  | <1.65↓  | 41.43   | 40.38   | 32.74   | 52.47   | 39.33   |
| TNF-b       | <1.93↓  | <1.93↓  | <1.93↓  | <1.93↓  | <1.93↓  | <1.93↓  | <1.93↓  | <1.93↓  | <1.93↓  | <1.93↓  |
| VEGF        | 430.16  | 554.29  | 94.61   | 437.24  | 360.59  | 63.34   | 60.19   | 23.72   | 82.83   | 59.22   |

Cytokine secretion is presented as pg/ml. **U:** Untreated, **L:** LPS, **LN:** LPS-Ng, **LA:** LPS-Az, **LC:** LPS-Cf

↓: Lower than minimum detectable concentration, ↑: Higher than maximum detectable concentration
